# Supplementary material
Source: PubMed Central journal article supplement (PMC150221)
Supplement: nar_31_4_1148__1.pdf [file nar_31_4_1148__1.pdf]

SUPPLEMENTARY MATERIAL

A N-terminal end

AtBRCA1 1 **MADITSHLE**-----RMGRELK**CPICLSL**YNSAV**SLSCNHVFCNACI**VKSMKMDATCPVCKIPYHRR 60  
 hBRCA1 1 **M-DLSALR**VEEVQNVINAMQKILE**CPICL**ELIK**EPVSTKCDHI**FKCF**QMLKLLNQK**-----KGP-SQ 60

B C-terminal end

AtBRCA1 730 **KKLIVLSCSGLTVEE**KTVIA**EFA**PLSGPTI**SKNWDSTVTHVI**API**NGACRRTL**K**FMMAI**  
 hBRCA1 1647 **KRMSMVVSGLTPEE**FMLVYK**FARKHHITL**INLIT**EEETHVVMKTD**A**EFVQERTL**K**YFLGI**

AtBRCA1 **LEGK**WIL**TIDMIKACM**KN**TKYVSE**EY**ETIMDVHGIR**--**EGPYLGRQ**AL**KKPKLFTGT**  
 hBRCA1 **AGGK**WVSY**FWVTQSIKER**K**MLNEHD**FEVR**GDVNGRNHQGPKRARE**---SQDR**KIFRGI**

AtBRCA1 **KFYIMGDF**ELAY**KGYLQDL**I**VAAG**TTILRRR**PVSD**NEAST**IVF**SM**EP**SK**KKTLTQRR**  
 hBRCA1 **EICCYGPF**IN**MPTDQLEW**V**QLCG**AS**VV**KE**LSFT**L**GTGVHP**IVV--**VQ**PD**AWT**-----ED

AtBRCA1 **SDAE**ALAKSAR**ARAASSW**LD**SLA**--**GQI**L--**VLI** 941  
 hBRCA1 **NGFH**AIG**QCEAPV**VTRE**WLD**SV**ALYQCE**EL**DTYLI**PQ**I**PHSHY 1863

C Consensus sequence of RING finger domain (smart00184)

AtBRCA1: 16 **CPICLSLY**-NSAM**SLSCNHVFCNACI**VKSMKMDA--**ICPVC** 53  
 Domain: 1 **CPICL**EEY**LKDPV**LP**CGHTFC**RS**CIRK**W**LESSNS**NT**CPIC** 41

D Consensus sequence of BRCA1 C-Terminus (BRCT) domain (pfam00533).

AtBRCA1: 729 **FSK**KL**V**SCS**GLTVEE**KT**VIAEFA**EL**SGVTI**SK**NWDSTVTHV**IAS**IN**ENG**ACKRITK**FM**M** 788  
 Domain: 6 **F**SG**L**TF**V**LT**GS**L**DSE**ER**DELKELI**E**K**LG**KVTSSV**SK**KTTHV**IV**GEN**AG**SKLEKALIA**-- 63

AtBRCA1: 789 **AILE**CK**WIL**T**IDMIKACM**KN**TKYVSE**EP**YEI** 819  
 Domain: 64 **---**LG**IP**IV**TEE**W**LLDCIK**KG**KLIP**ED**DYLL** 91

AtBRCA1: 840 **KKP**KL**FTGL**K**FYIMG**DFELAY**KGYLQDL**I**VAAG**GTILRRR**PVSD**NEAST**IV**F**S**VE**PS** 899  
 Domain: 1 **PSE**KL**F**SG**L**TF**V**LT**GS**L**DSE**ER**DELKELI**E**K**LG**K**-----**V**LS**SV**SK**KTTHV**IV**GEN**AG 54

AtBRCA1: 900 **KK**KT**L**T**QRR**SD**AE**ALAKSAR**ARAASSW**LD**SLA**GS**AGCQIT** 938  
 Domain: 55 **SK**LE**KALIA**-----LG**IP**IV**TEE**W**LLDCIK**KG**KLIP** 84

Figure S1. Analysis of AtBRCA1 protein domains. Alignment using Alignp of AtBRCA1 with (A) N-terminal region, (B) C-terminal region of hBRCA1 and (C) RING and (D) BRCT consensus domain sequences. Identical amino acids are boxed in black and similar amino acids in grey.
